# Supplementary material
Source: PubMed Central journal article supplement (PMC4441044)
Supplement: NIHMS687479-supplement-Suppl_files.pdf [file NIHMS687479-supplement-Suppl_files.pdf]

## APPENDIX A: Online Supplementary Material

Table AI. Random-effects logistic regression of alcohol dependence on GABRA2 Genotype (SNP rs279871), gender, and socio-demographic controls, COGA (n=2,281)

|                           | <b>Model I</b> | <b>Model II</b> | <b>Model III</b> |
|---------------------------|----------------|-----------------|------------------|
|                           | b (SE)         | b (SE)          | b (SE)           |
| High risk genotype        | 0.28 (0.11)**  | 0.27 (0.12)*    |                  |
| Female                    |                | -1.56 (0.11)*** | -1.35 (0.13)***  |
| Age (10 years)            |                | -0.07 (0.04)    | -0.07 (0.04)     |
| Education (years)         |                | -0.13 (0.03)*** | -0.13 (0.03)***  |
| Currently married         |                | -0.34 (0.13)**  | -0.36 (0.13)**   |
| Log of HH income (\$10K)  |                | -0.13 (0.05)**  | -0.13 (0.05)**   |
| High risk genotype*Female |                |                 | -0.06 (0.17)     |
| High risk genotype*Male   |                |                 | 0.61 (0.17)***   |
| Constant                  | -0.84 (0.08)   | 2.30 (0.40)     | 2.20 (0.40)      |
| Intra-class correlation   | 0.18           | 0.22            | 0.22             |
| Wald X <sup>2</sup>       | 6.80**         | 242.00***       | 247.18***        |

*Notes:* b=beta coefficient; SE=standard error; Age units are tens of years to facilitate interpretation;  
\* p<.05; \*\* p<.01; \*\*\* p<.001

Table AII. Random-effects logistic regression of alcohol dependence on the interaction of GABRA2 genotype (SNP rs279871), gender, and daily uplifts, COGA (n=2,281)

|                                   | <b>Model I</b><br>b (SE) | <b>Model II</b><br>b (SE) | <b>Model III</b><br>b (SE) |
|-----------------------------------|--------------------------|---------------------------|----------------------------|
| High risk genotype                | 0.25 (0.12)*             |                           |                            |
| Female                            | -1.62 (0.12)***          | -1.62 (0.12)***           | -1.62 (0.12)***            |
| Age (10 years)                    | -0.03 (0.04)             | -0.03 (0.04)              | -0.03 (0.04)               |
| Education (years)                 | -0.13 (0.03)***          | -0.13 (0.03)***           | -0.13 (0.03)***            |
| Currently married                 | -0.39 (0.13)**           | -0.39 (0.13)**            | -0.39 (0.13)**             |
| Log of HH income (\$10K)          | -0.10 (0.05)*            | -0.10 (0.05)*             | -0.10 (0.05)*              |
| Daily hassles                     | 0.90 (0.14)***           | 0.90 (0.14)***            | 0.90 (0.14)***             |
| Daily uplifts                     | -0.16 (0.12)             |                           |                            |
| Uplifts*High risk genotype        |                          | -0.34 (0.21)              |                            |
| Uplifts*Low risk genotype         |                          | -0.08 (0.15)              |                            |
| High risk genotype*Female         |                          |                           | -0.21 (0.41)               |
| High risk genotype*Male           |                          |                           | 1.19 (0.39)***             |
| Uplifts*Female*High risk genotype |                          |                           | 0.02 (0.31)                |
| Uplifts*Male*High risk genotype   |                          |                           | -0.67 (0.30)*              |
| Uplifts*Female*Low risk genotype  |                          |                           | -0.11 (0.22)               |
| Uplifts*Male*Low risk genotype    |                          |                           | -0.06 (0.19)               |
| Constant                          | 1.77 (0.42)              | 1.69 (0.43)               | 1.58 (0.45)                |
| Intra-class correlation           | 0.23                     | 0.23                      | 0.23                       |
| Wald $X^2$                        | 263.18***                | 263.87***                 | 275.08***                  |

Notes: b=beta coefficient; SE=standard error; Age units are tens of years to facilitate interpretation; \* p<.05; \*\* p<.01; \*\*\* p<.001
